# Supplementary material for: Soil-Free Origins, Root-Deep Impact: Unlocking the Power of Native, Non-rhizosphere TrichodermaIsolates in Plant Growth and Yield under Agrochemical Environments
Source: Research Square preprint supplement (doi:10.21203/rs.3.rs-6653952/v1), 2025-06-05
Supplement: Supplementary file 1 [file 13e8dcb7f6eec3d170099144.docx]

**Supplementary table 1: Different compatibility reactions**

| **Sl. No.** | **Reaction** | **Description** | **Per cent mycelial inhibition** |
| --- | --- | --- | --- |
| 1 | HC | Highly compatible | <20 |
| 2 | C | Compatible | 21-40 |
| 3 | MC | Moderately compatible | 41-60 |
| 4 | MIC | Moderately incompatible | 61-80 |
| 5 | HIC | Highly incompatible | >81 |

**Supplementary table 2: Compatibility reactions of various agrochemicals with different native *Trichoderma* isolates at 1500ppm.**

Contd.

| **Sl. No.** | **Insecticides/ Bactericide/ Herbicide** | ***Trichoderma* isolates** | | | | | |
| --- | --- | --- | --- | --- | --- | --- | --- |
| **SMV** | **SDKd** | **GMV** | **PSV** | **CPV** | **Commercial** |
| **Insecticides** | | | | | | | |
| 1 | Thiamethoxam 25% WG | C | C | C | C | C | MC |
| 2 | Flubendiamide 20% WG | MC | C | HC | MI | MC | MC |
| 3 | Chlorantraniliprole 20% SC | MC | C | C | MC | MC | MC |
| 4 | Fipronil 5% SC | MC | C | C | HC | MI | MI |
| 5 | Chlorpyrifos 50% EC | MC | HC | HC | HC | HC | MC |
| 6 | Emamectin benzoate 5% SG | MC | C | C | MC | MC | MC |
| 7 | Imidachloprid 20% SC | MC | MC | MC | MC | MC | MC |
| **Bactericide** | | | | | | | |
| 8 | K-cyclin | MC | MC | MC | MI | MI | MI |
| **Herbicide** | | | | | | | |
| 9 | Butachlor 50% EC | MC | C | HC | C | MC | MC |

**Supplementary table 3: Uptake of different nutrients enhanced by application of native isolates of *Trichoderma* spp.**

| **Sl. No.** | **Isolates** | **Nutrients increased** |
| --- | --- | --- |
| 1 | SMV | Zn, Cu, Mn and Fe |
| 2 | SDKd | Mn, N |
| 3 | GMV | Mn and Fe |
| 4 | PSV | Zn, Cu and Fe |
| 5 | CPV | Zn |
| 6 | Commercial | --- |

**Supplementary table 4: Influence of native isolates of *Trichoderma* spp. on plant height (cm) of tomato at different intervals**

| **Sl. No.** | ***Trichoderma* isolates** | **Plant height (cm)** | | | | | | | | | | | | | | | |
| --- | --- | --- | --- | --- | --- | --- | --- | --- | --- | --- | --- | --- | --- | --- | --- | --- | --- |
| **15 DAT** | | | | **30 DAT** | | | | **45 DAT** | | | | **90 DAT** | | | |
| **Treatments** | | | | **Treatments** | | | | **Treatments** | | | | **Treatments** | | | |
| T1 | T2 | T3 | T4 | T1 | T2 | T3 | T4 | T1 | T2 | T3 | T4 | T1 | T2 | T3 | T4 |
| **1** | **SMV** | 34.11 | 41.22 | 36.45 | 29.66 | 73.22 | 82.65 | 79.22 | 57.22 | 104.23 | 119.24 | 114.36 | 86.22 | 140.68 | 171.24 | 160.24 | 110.21 |
| **2** | **SDKD** | 33.68 | 39.67 | 37.11 | 29.66 | 70.68 | 85.61 | 78.65 | 57.22 | 103.63 | 121.89 | 115.24 | 86.22 | 119.22 | 157.26 | 137.36 | 110.21 |
| **3** | **GMV** | 34.99 | 43.22 | 37.66 | 29.66 | 73.55 | 89.68 | 81.36 | 57.22 | 99.68 | 116.98 | 114.12 | 86.22 | 127.65 | 173.36 | 140.52 | 110.21 |
| **4** | **PSV** | 35.84 | 42.68 | 38.78 | 29.66 | 76.24 | 87.54 | 82.66 | 57.22 | 104.56 | 123.54 | 117.55 | 86.22 | 138.98 | 172.32 | 152.43 | 110.21 |
| **5** | **CPV** | 31.55 | 42.53 | 35.84 | 29.66 | 64.35 | 79.68 | 77.45 | 57.22 | 100.55 | 117.65 | 112.21 | 86.22 | 124.11 | 142.44 | 127.37 | 110.21 |
| **6** | **Commercial** | 31.98 | 39.55 | 36.26 | 29.66 | 69.53 | 84.55 | 78.66 | 57.22 | 98.63 | 116.54 | 111.68 | 86.22 | 120.62 | 135.22 | 144.26 | 110.21 |
| **7** | **Mean** | 33.69 | 41.48 | 37.02 | 29.66 | 71.26 | 84.95 | 79.67 | 57.22 | 101.88 | 119.31 | 114.19 | 86.22 | 128.54 | 157.47 | 143.70 | 110.21 |
| **8** |  | **I** | **T** | **I*T** |  | **I** | **T** | **I*T** |  | **I** | **T** | **I*T** |  | **I** | **T** | **I*T** |  |
| **9** | **F** | ** | ** | NS |  | ** | ** | ** |  | ** | ** | NS |  | ** | ** | ** |  |
| **10** | **SE m ±** | 0.48 | 0.41 | 0.96 |  | 0.58 | 0.47 | 1.14 |  | 0.73 | 0.60 | 1.42 |  | 2.02 | 1.61 | 4.02 |  |
| **11** | **CD @1%** | 1.83 | 1.49 | 3.72 |  | 2.15 | 1.77 | 4.30 |  | 2.73 | 2.24 | 5.43 |  | 7.60 | 6.17 | 15.19 |  |

****-** Significant, NS- Non-significant @ 1% level, I- Isolate, T- Treatment, I*T- Interaction.

# Supplementary table 5: Influence of native isolates of *Trichoderma* spp. on tomato plant fresh and dry weight (g) at 90 DAT

| **Sl.**  **No.** | ***Trichoderma***  **Isolates** | **Plant fresh weight at 90 DAT** | | | | **Plant dry weight at 90 DAT** | | | |
| --- | --- | --- | --- | --- | --- | --- | --- | --- | --- |
| Treatments | | | | Treatments | | | |
| T1 | T2 | T3 | T4 | T1 | T2 | T3 | T4 |
| **1** | SMV | 169.89 | 217.66 | 199.87 | 142.66 | 25.33 | 41.65 | 37.22 | 22.75 |
| **2** | SDKD | 145.22 | 200.55 | 175.99 | 142.66 | 23.45 | 40.21 | 28.69 | 22.75 |
| **3** | GMV | 196.56 | 263.68 | 245.68 | 142.66 | 29.56 | 53.22 | 40.88 | 22.75 |
| **4** | PSV | 148.57 | 227.69 | 213.11 | 142.66 | 28.12 | 43.68 | 36.15 | 22.75 |
| **5** | CPV | 142.36 | 170.89 | 168.55 | 142.66 | 22.67 | 35.22 | 28.68 | 22.75 |
| **6** | Commercial | 144.69 | 195.66 | 187.58 | 142.66 | 23.15 | 37.68 | 28.22 | 22.75 |
| **7** | **Mean** | 157.88 | 212.69 | 198.46 | 142.66 | 25.38 | 42.28 | 33.31 | 22.75 |
| **8** |  | **I** | **T** | **I*T** |  | **I** | **T** | **I*T** |  |
| **9** | **F** | ** | ** | ** |  | ** | ** | NS |  |
| **10** | **SEm ±** | 1.39 | 1.14 | 2.76 |  | 1.09 | 0.90 | 2.17 |  |
| **11** | **CD @1%** | 5.26 | 4.29 | 10.46 |  | 4.21 | 3.38 | 8.26 |  |

****-** Significant, NS- Non-significant @ 1% level, I- Isolate, T- Treatment, I*T- Interaction.

# Supplementary table 6: Influence of native isolates of *Trichoderma* spp. on tomato root length (cm), root fresh and dry weight (g) after harvesting (90 DAT)

| **Sl.**  **No.** | ***Trichoderma***  **Isolates** | **Root length (cm)** | | | | **Root fresh weight (g)** | | | | **Root dry weight (g)** | | | |
| --- | --- | --- | --- | --- | --- | --- | --- | --- | --- | --- | --- | --- | --- |
| **Treatments** | | | | **Treatments** | | | | **Treatments** | | | |
| T1 | T2 | T3 | T4 | T1 | T2 | T3 | T4 | T1 | T2 | T3 | T4 |
| **1** | SMV | 21.24 | 30.45 | 28.11 | 17.88 | 16.56 | 46.68 | 36.14 | 15.65 | 3.98 | 14.26 | 9.78 | 3.33 |
| **2** | SDKD | 20.12 | 26.98 | 22.05 | 17.88 | 16.21 | 25.33 | 20.87 | 15.65 | 3.65 | 6.87 | 5.77 | 3.33 |
| **3** | GMV | 23.13 | 29.78 | 23.61 | 17.88 | 16.55 | 29.45 | 19.24 | 15.65 | 3.87 | 12.24 | 4.98 | 3.33 |
| **4** | PSV | 22.05 | 30.11 | 24.55 | 17.88 | 21.1 | 42.12 | 25.45 | 15.65 | 4.54 | 12.41 | 9.66 | 3.33 |
| **5** | CPV | 20.89 | 25.36 | 21.68 | 17.88 | 18.5 | 28.15 | 21.12 | 15.65 | 4.38 | 8.31 | 7.35 | 3.33 |
| **6** | Commercial | 20.65 | 26.24 | 21.44 | 17.88 | 15.87 | 26.77 | 20.68 | 15.65 | 3.37 | 7.29 | 6.95 | 3.33 |
|  | **Mean** | 21.35 | 28.15 | 23.57 | 17.88 | 17.47 | 33.08 | 23.92 | 15.65 | 3.97 | 10.23 | 7.42 | 3.33 |
|  |  | **I** | **T** | **I*T** |  | **I** | **T** | **I*T** |  | **I** | **T** | **I*T** |  |
|  | **F** | ** | ** | ** |  | ** | ** | ** |  | ** | ** | ** |  |
|  | **S. E. m. ±** | 0.25 | 0.21 | 0.49 |  | 0.58 | 0.45 | 1.11 |  | 0.12 | 0.10 | 0.21 |  |
|  | **CD @1%** | 0.92 | 0.76 | 1.83 |  | 2.15 | 1.76 | 4.29 |  | 0.39 | 0.33 | 0.76 |  |

****-** Significant, NS- Non-significant @ 1% level, I- Isolate, T- Treatment, I*T- Interaction.
